# Supplementary material for: High-performance flexible electronics from organic fluorosilicone/carbon composites for low-temperature wearable sensors
Source: Royal Society of Chemistry journal article supplement (doi:10.1039/d6ra02458k), 2026-05-22
Supplement: d6ra02458k1.pdf [file d6ra02458k1.pdf]

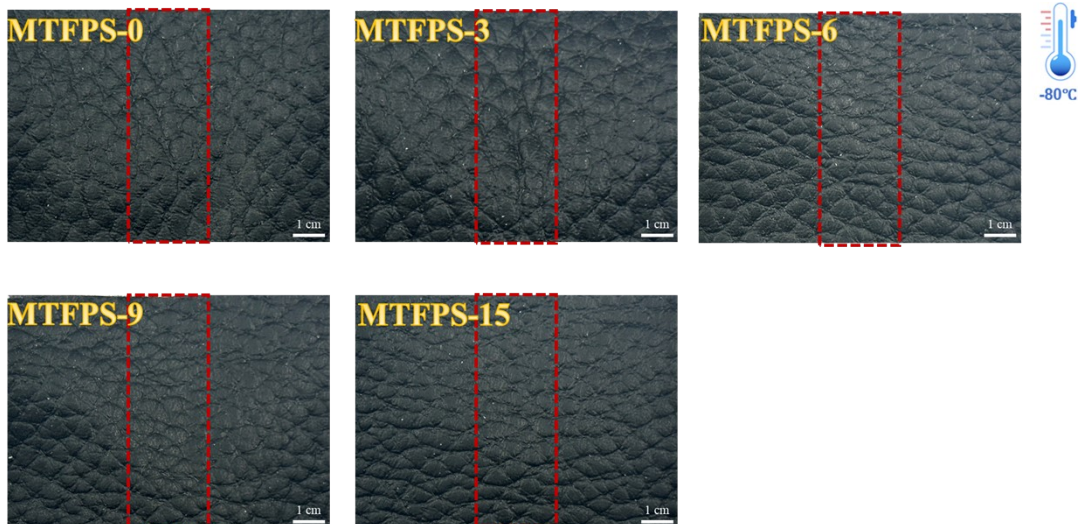

Fig.S3 Bending resistance diagram of MTFPS synthetic leather with different fluorosilicone oil contents at -80 °C.

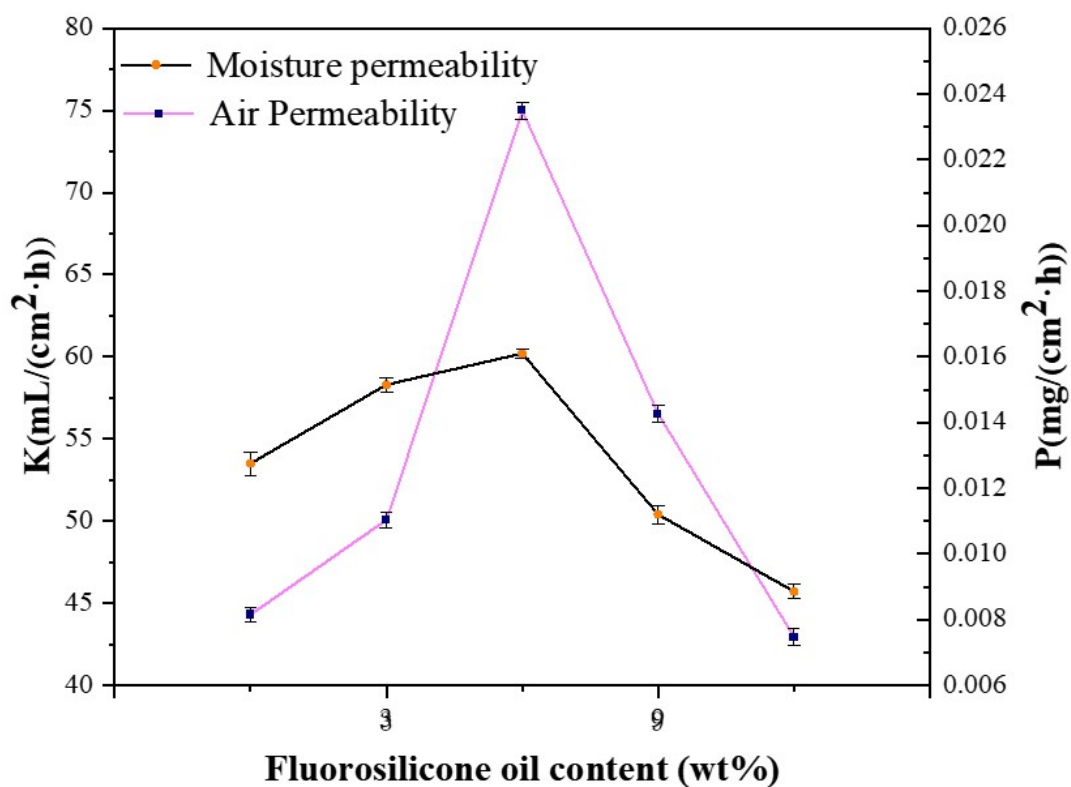

Fig.S4 Diagrams of the air and water vapor permeability of MTFPS synthetic leather with different fluorosilicone oil contents.

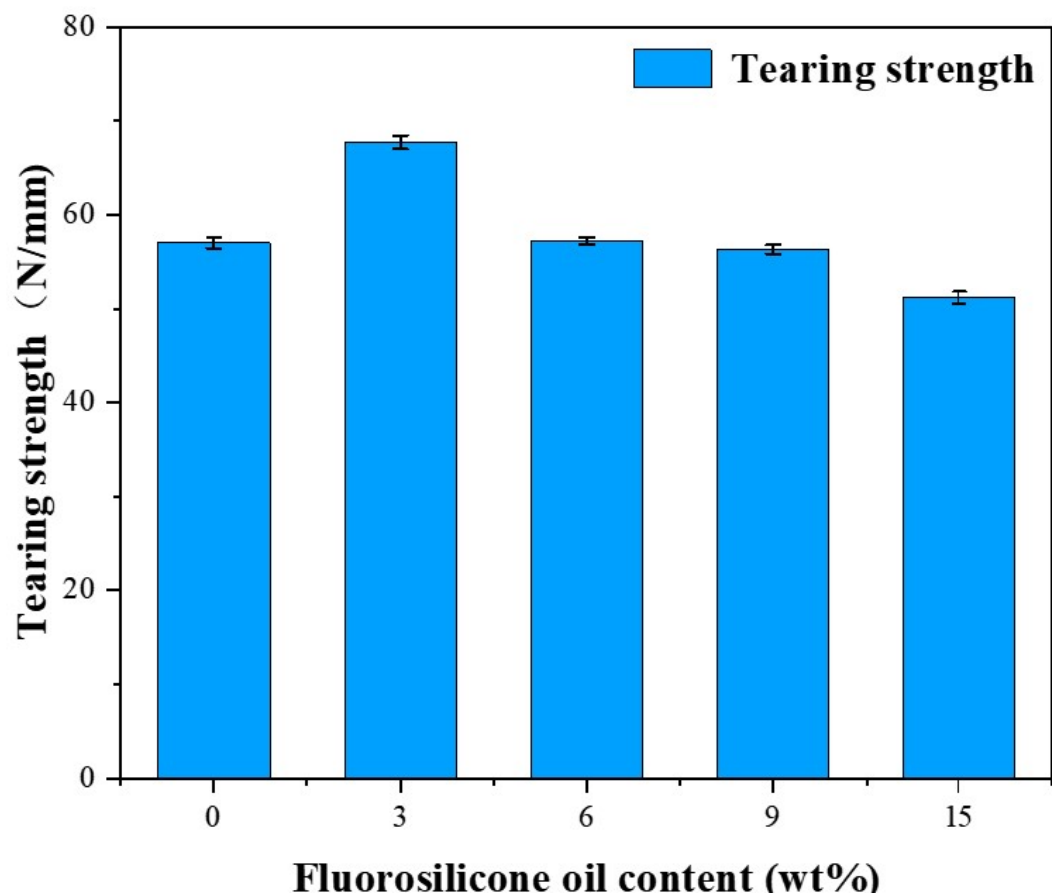

Fig.S5 Tearing strength performance diagrams of MTFPS synthetic leather with different fluorosilicone oil contents
